# Supplementary material
Source: MDPI journal article supplement (https://www.mdpi.com/2226-4310/5/4/99)
Supplement: s1 [file s1]

Supplementary material to the paper “Flow Visualization around a Flapping-Wing Micro Air Vehicle in Free Flight”

Movie 1: Excerpt of a particle image recording for the streamwise visualization, covering one full flapping cycle. Original acquisition rate is 2000 fps, play-back is at 1/250 of true speed.
